# Supplementary material
Source: PubMed Central journal article supplement (PMC5681367)
Supplement: NIHMS900652-supplement-Supp_FigS1.pdf [file NIHMS900652-supplement-Supp_FigS1.pdf]

**Supplementary Figure S1: Illustration of the Calculation of Net Reclassification Index for LLFDI-FUNCTION + ACS Risk vs. ACS Risk Alone for Predicting an Adverse Postoperative Course**

|       |                                 |   |                                       |
|-------|---------------------------------|---|---------------------------------------|
| NRI = | [ P(up event) - P(down event) ] | + | [ P(down nonevent) - P(up nonevent) ] |
| =     | [ P( 51 / 105) - P( 54 / 105) ] | + | [ P( 231 / 298 ) - P( 67 / 298 ) ]    |
| =     | [ -3 / 105 ]                    | + | [ 164 / 298 ]                         |
| =     | - 0.03                          | + | 0.55                                  |
| =     | 0.52                            |   |                                       |

P (up | event) represents the proportion of patients with an adverse postoperative course (i.e. the event) whose predicted probability of an adverse postoperative course is higher (appropriately upgraded) with Model 2 (LLFDI-FUNCTION + ACS Risk) compared with Model 1 (ACS Risk alone). P (down | event) is the proportion of patients with an adverse course who predicted probability is lower with the Model 2 (inappropriately downgraded) compared with Model 1. Similar descriptions apply for the remaining part of the NRI formula related to patients without an adverse postoperative course (nonevents).

**Abbreviations:** ACS Risk =American College of Surgeons Universal Risk calculator based risk of serious complications, NRI=Net Reclassification Index, LLFDI-FUNCTION = function part of the computer adaptive testing version of the Late Life Function and Disability Instrument.
